# Supplementary material for: Shades of yellow: interactive effects of visual and odour cues in a pest beetle
Source: PeerJ. 2016 Jul 12;4:e2219. doi: 10.7717/peerj.2219 (PMC4950555; doi:10.7717/peerj.2219)
Supplement: Supplemental Information 4 [file peerj-04-2219-s004.xlsx]

## Sheet: Walking vectors and distances
Insect number	Colour of visual stimulus	Angle of visual stimulus (degrees)	Upward distance period 1 (mm)	Upward distance period 2 (mm)	Upward distance period 3 (mm)	Upward distance period 4 (mm)	Upward distance period 5 (mm)	Vector period 1 (degrees)	Vector period 2 (degrees)	Vector period 3 (degrees)	Vector period 4 (degrees)	Vector period 5 (degrees)
			No airflow	Clean airflow	Odour present	Odour present	No airflow	No airflow	Clean airflow	Odour present	Odour present	No airflow
1	Sand	90	281.1	27.4	33.6	321.9	134.2	26.295	83.2632	74.7646	48.6469	69.5856
2	Sand	270	44	84.3	-156.2	-331.1	-313.6	320.711	295.939	120.554	139.053	189.391
3	Sand	90	8.6	26.6	-153.5	-122.6	-9	80.3192	76.3461	118.544	116.621	196.699
4	Sand	90	-27	-202.9	-164.2	-87.5	177.1	263.728	211.924	238.509	253.149	36.7195
5	Sand	270	68.1	99.8	NA	NA	NA	286.838	306.413	NA	NA	NA
6	Sand	90	18.8	19.4	123	131.3	-151.5	29.2857	76.2406	51.1807	39.784	160.661
7	Sand	270	406.1	362.1	150.4	-174	-18.2	319.935	306.404	310.918	131.424	134.843
8	Sand	270	559	248.8	547.4	646.6	652.8	349.037	323.078	351.215	358.195	347.364
9	Sand	90	213.4	231.5	-105.1	-163.3	196.8	34.3707	43.1169	248.127	200.452	0.406965
10	Sand	270	150.3	-153.8	-336.4	-266	43.9	292.962	110.052	209.268	154.936	279.904
11	Sand	270	0.8	-67.7	-223.1	111.9	150.6	281.976	121.625	213.328	358.261	306.424
12	Sand	270	-321.4	-298.6	-175.8	-92.2	-136.7	201.611	187.368	155.155	169.914	127.301
13	Sand	90	-132.3	117.8	-145.5	111.5	-159.7	190.643	29.3716	115.314	23.7237	180.923
14	Sand	90	33.1	6.7	20.2	-23.8	-0.5	52.7952	37.2782	19.8692	227.965	191.31
15	Sand	270	312.3	13.5	121.5	-26.8	-187.3	312.136	277.595	330.21	99.8939	209.818
16	Yellow textured	90	0.2	0.6	-96.5	-399.8	-136.7	68.1986	45	123.409	180.558	157.091
17	Yellow textured	90	-322.9	-416.3	-409	-406.1	-331.1	165.872	168.555	198.92	181.905	160.723
18	Yellow textured	270	0.6	-120.3	-45.4	14	104	275.194	141.82	123.192	284.182	332.584
19	Yellow textured	270	-465.7	-489	-196.9	-413.1	239	179.877	175.152	128.711	140.315	323.597
20	Yellow textured	270	-314.5	-290.8	-273	88.8	-309.3	192.772	198.405	224.105	316.462	212.878
21	Yellow textured	90	11.9	-190.7	-90.8	-121.9	15.8	87.73	164.999	200.251	240.411	86.7057
22	Yellow textured	90	-3.2	-13.1	127.1	297.1	-11.4	253.496	99.9598	24.6437	1.11877	241.39
23	Yellow textured	270	6	-77.3	74	66.7	141.8	335.772	221.918	306.972	313.613	327.206
24	Yellow textured	270	-4.8	-29.1	-92.6	-90.1	-2.3	158.405	146.355	175.18	148.23	97.8883
25	Yellow textured	270	-35.5	-24.2	9.2	-16.7	-24.2	147.98	121.174	279.232	123.428	115.872
26	Yellow textured	90	-63.2	83.5	449.6	181.8	186.3	241.582	71.2809	0.968862	49.3987	68.9577
27	Yellow textured	90	-89	162.3	-128.3	-93	-97.9	112.162	55.9864	109.794	108.079	111.59
28	Yellow textured	270	-4.5	-42	-3	-5.4	-84.6	91.2082	97.0359	90.8791	91.408	100.207
29	Yellow textured	270	NA	44.4	121.4	225.5	274.9	NA	332.819	318.618	339.835	350.737
30	Yellow textured	270	-555.7	-478.5	-8.6	-195.1	-197.3	169.499	166.294	91.6534	187.161	163.405
31	Yellow textured	90	139.6	-196.7	-360.8	375.3	-106.2	59.9848	198.278	174.22	22.4682	251.554
32	Amber	270	-15.2	265.3	217.4	96.9	74.9	111.096	358.232	345.16	324.699	301.186
33	Amber	90	-135.1	33.9	91	-6.7	-101	164.698	21.6013	6.53404	94.8275	122.645
34	Amber	90	119	218.1	55.2	282.7	34.4	57.3413	40.2105	46.0732	60.862	76.1761
35	Amber	90	-336.4	-119.2	433.4	396.3	27.4	158.025	188.443	18.113	42.2802	83.8723
36	Amber	270	-64.8	54.2	-27.2	-22.7	-155.8	98.7687	287.171	95.1079	92.6354	115.703
37	Amber	270	7.2	4	-29.1	NA	NA	287.65	274.702	186.858	NA	NA
38	Amber	90	21.1	-5	3.8	3.2	-8.2	49.3795	98.5392	56.3099	18.9704	162.408
39	Amber	270	-93.7	7.4	-51.4	7.3	-53.1	119.165	273.03	105.779	272.437	149.757
40	Amber	90	-1	67.1	-29.6	-21	55.9	90.1916	80.0152	103.395	105.782	54.6141
41	Amber	90	-267.7	-581.9	-401.3	-512.9	-406.3	187.936	182.037	167.736	177.6	152.896
42	Amber	270	-26.5	134.6	125.4	-10.3	125.6	97.9732	308.705	295.566	92.3387	305.476
43	Amber	90	68.4	-451.6	151.4	453.5	119	58.9081	190.83	35.4271	13.2335	11.2729
44	Amber	270	18.6	73.4	110.5	-73.5	-62.3	279.364	298.236	307.714	242.862	202.26
45	Amber	270	98.7	-117.9	36.3	53.9	157.4	343.253	228.657	279.566	332.303	313.565
46	Amber	90	328.8	353.1	109.5	218.7	209.3	10.934	30.8132	77.079	65.7492	48.6425
47	Orange	270	128	67.6	541.2	366.2	2530.2	292.224	288.957	342.113	344.942	328.931
48	Orange	270	-59.1	-12.9	-199.2	-113.8	-53.7	109.685	105.829	127.214	150.19	105.161
49	Orange	270	43.9	72.7	102.2	169.5	-60.4	288.686	289.57	316.138	353.459	218.509
50	Orange	90	280.4	72.2	319.3	-0.2	NA	58.663	56.0788	61.8683	90.2001	NA
51	Orange	90	17.6	30.7	-6.9	-16.6	-17	83.2569	77.2925	97.2684	118.168	165.805
52	Orange	270	-33.3	-29.1	79.3	117.9	149.1	95.9218	94.8825	281.88	301.616	352.809
53	Orange	90	292.2	133.8	160.2	328.4	-39.9	39.4032	11.0138	14.1957	24.9489	98.7232
54	Orange	90	-246	-123.4	-86.9	152	-55.3	122.698	124.161	107.787	35.8953	188.303
55	Orange	270	11.4	118.5	226.3	186.5	42.9	272.274	288.916	309.612	317.804	281.558
56	Orange	270	-71.4	23.2	-43.5	29.7	35.1	134.92	279.101	121.712	295.171	301.669
57	Orange	270	40.1	98.9	29.4	186.3	103.6	278.063	308.117	282.447	312.111	353.581
58	Orange	90	-307.3	-382.1	-205.8	-271.2	-93.8	160.239	162.546	122.186	130.035	115.999
59	Orange	90	105.3	-110.9	-314.8	-51.4	-241.4	64.4124	108.251	127.207	97.3682	121.025
60	Orange	270	8.4	119.6	-2.4	91.8	65.3	306.87	325.092	98.7197	313.868	332.083
61	Orange	270	-81.4	70	-9.3	-24.3	-37.1	164.308	285.79	93.8713	95.5495	98.4526
62	Black	90	-204	-207.7	-100.3	-84.3	-79.6	111.117	120.401	100.735	97.9102	98.0742
63	Black	90	-11.1	62	158.2	152.8	427.2	94.099	72.5997	46.4643	55.2427	41.2589
64	Black	90	-1	-33.4	-17.9	-22.4	-19.5	114.624	105.098	96.5861	93.9818	93.0898
65	Black	90	7.1	-21.5	-62.9	6.4	145.8	86.5538	261.049	245.621	85.3378	59.3888
66	Black	90	NA	NA	0.1	-1.5	NA	NA	NA	63.4349	128.29	NA
67	Black	90	383.3	100.4	-64.8	-288.9	-192.1	29.4414	75.159	127.223	221.807	221.063
68	Black	90	12.6	5	38	4.6	62.9	86.728	88.331	80.0763	88.2067	78.0043
69	Black	90	134.7	78	112	16.1	152.8	40.0681	55.3603	75.1424	86.7094	68.1598
70	Black	90	5.7	-79.8	33.6	79.3	37.2	87.9088	158.459	83.2504	75.1176	79.3278
71	Black	90	-0.3	-6.1	-22	-24	-48.7	90.9341	104.036	111.73	107.312	142.721
72	Black	90	-231.5	-525.4	-317.6	-376.4	-234.7	126.602	143.202	163.395	182.388	236.015
73	Black	90	-44.9	-146.7	-12	27.7	-5.8	100.482	120.055	91.5853	86.7133	90.7041
74	Black	90	12.4	-4.8	6.9	47.2	29.9	83.4018	91.0485	88.5884	81.7542	83.3716
75	Black	90	-0.3	-18.6	-4.2	-149.4	-24.2	90.6535	114.58	198.853	204.464	113.461
76	Black	90	-48.4	-39.5	28.8	24.1	108.4	103.995	105.896	85.7538	86.265	76.2978
77	Black	90	-92.2	281.8	389.5	540.4	-18.7	108.97	47.8936	27.7009	4.07128	266.752
78	Black	90	NA	0.7	7.2	44.2	-51.3	NA	40.6013	87.213	83.1658	96.6322
79	Black	90	-4.9	-9.2	-87.7	-149.9	-69.4	139.399	116.441	120.446	122.637	98.5975
80	Black	90	267.8	201.5	86.2	-14.6	0.3	45.3716	43.5559	81.8446	92.1055	89.9448
81	Yellow	90	-102.7	-14.5	-121.4	-144.6	-45.6	100.53	91.5502	109.457	110.119	93.6258
82	Yellow	90	360.4	-5.9	-72.6	-181.4	-247.6	11.8381	90.8987	100.012	107.928	117.073
83	Yellow	90	89.4	-83.7	-533.5	-279.7	-255.1	101.995	115.017	83.6598	108.886	245.821
84	Yellow	90	13.5	-2.5	-214	-568.3	-111.6	75.8963	123.183	161.852	218.29	188.007
85	Yellow	90	13.5	-2.5	-214	-568.3	-111.6	21.0659	249.353	137.696	163.441	161.565
86	Yellow	90	-45.5	25.5	-25.4	-143.7	-104.9	165.343	22.7633	136.529	205.806	231.362
87	Yellow	90	0.2		2.8	80.8	176.3	75.9638	NA	42.7974	29.0064	3.11683
88	Yellow	90	147.8	154.1	327.5	196.8	366.2	24.7063	70.8675	64.4338	78.1014	63.9691
89	Yellow	90	99.3	-288.8	-522.5	-300.2	-109.7	61.062	148.08	177.254	162.97	193.876
90	Yellow	90	-0.1	42.4	65.5	20.7	542.5	243.435	17.6613	7.56599	38.8953	25.0718
91	Yellow	90	-89.6	-169.3	-253.4	-15.5	-76.1	198.855	193.399	189.857	147.824	162.945
92	Yellow	90	-110.9	-43.2	-29.6	-3.7	-170.1	102.304	102.341	112.722	224.256	165.591
93	Yellow	90	154.2	192	0	NA	NA	32.3299	10.1401	5.12727	NA	NA
94	Yellow	90	-330.2	-383.9	-307.4	-357.2	-208.6	141.565	149.865	142.966	153.429	152.108
95	Yellow	90	-206.3	-31.3	-52.4	-167.5	-253.9	187.32	154.622	147.347	157.663	159.649
96	Yellow	90	-6.8	-196.6	-4.9	-151.8	-38.3	100.042	169.032	222.614	196.581	187.143
97	Yellow	90	218.2	-301.5	-483.9	-381.5	-19.9	68.4067	133.351	183.688	160.249	267.87
98	Yellow	90	-107.4	0.2	-47.1	-23.6	-22.1	149.249	89.7694	129.865	108.124	169.992
99	Yellow	90	-19	-229.6	-148.9	-16.7	-23.2	104.941	156.654	124.187	104.816	99.0872
100	Yellow	90	-0.2	34.2	-16.3	-138.6	-82.4	90.1164	72.0069	93.8936	131.299	134.482
101	Yellow	90	108.2	-176.4	-168.8	-290.2	-497.1	16.8643	148.746	119.995	162.427	150.276
102	Yellow	90	-63.4	-70.3	-216.8	-146.4	133.6	241.32	229.158	154.795	192.777	56.2376
103	Yellow	90	5.1	-0.6	-1.2	5.2	-0.3	1.1233	206.565	146.31	8.74616	246.801
104	Yellow	90	61.9	-316.3	-574.1	-1028.5	-919.3	84.6539	148.425	148.717	167.953	165.236
105	Yellow	90	70.3	70.7	139.8	NA		61.5669	40.9423	19.0963	122.768	NA
106	Yellow	90	-60.7	-13.4	-50.3	-164.3	-94.5	156.415	187.651	159.606	190.262	214.38
107	Yellow	90	200.6	153.3	-58.4	141	-11	28.9138	9.03371	127.011	6.20607	250.334
108	Yellow	90	-36.2	-14	1	-0.4	-1	172.758	149.338	84.9869	94.6669	90.4747
109	Yellow	90	0.2	NA	NA	-0.3		26.5651	NA	NA	146.31	NA
110	Yellow	90	-424.4	-316	-504.7	-300.7	16.7	192.243	192.621	194.438	203.709	87.9957
111	Yellow	90	-181.1	-111.8	-76.9	-130.6	-96.2	142.318	187.648	151.178	197.183	162.426
112	Control	90	-220.2	-460.6	-442.2	-217.5	-123	252.53	208.297	178.536	239.283	257.446
113	Control	90	66	68.3	261	304.5	111.6	33.4284	13.7205	18.7371	8.62456	14.9506
114	Control	90	NA	-0.1	NA	4.5	103.2	NA	108.435	NA	41.6335	20.0678
115	Control	90	-39.7	38.9	42.1	62.4	235.8	166.51	27.0928	5.02259	48.8706	9.30063
116	Control	90	-86.1	-380.5	-207.4	-156.6	1.7	151.656	171.081	183.201	206.007	54.2461
117	Control	90	-3.7	-0.9	NA	NA	-0.6	250.989	237.265	NA	NA	98.1301
118	Control	90	-51.3	-28	-31.7	-28.1	-9	182.673	175.507	176.042	140.335	117.464
119	Control	90	32	-85.7	-86.2	29.1	-185.6	3.58752	133.917	186.006	84.5526	176.827
120	Control	90	-21.9	-184.9	-212.5	-300.5	-162.9	172.423	200.315	186.29	196.896	193.937
121	Control	90	-8.4	-41.9	-6.4	-45.6	-23.9	165.324	220.59	121.608	230.593	248.444
122	Control	90	65.8	21.3	22	-78.9	-65.3	10.7883	42.1798	54.8113	161.478	181.669
123	Control	90	-6.3	-14.2	-2.5	9.8	-22.8	101.776	96.0377	91.0717	87.2973	97.8995
124	Control	90	-245.5	-247.5	-182	-2.8	30.6	185.045	189.811	163.901	91.0553	82.4895
125	Control	90	-55.1	-89.8	-24.7	-116.4	-107.5	185.082	221.199	246.861	210.018	217.805
126	Control	90	156	129.9	105.2	54.7	-182.1	29.3438	7.68672	57.7451	65.8273	155.729
127	Control	90	45.4	-166.7	-56.9	-48.1	-186.9	25.1342	203.186	222.138	220.932	188.4
128	Control	90	102	-400.4	-553.7	-690.2	-455.7	76.6868	192.918	168.849	185.647	210.558
129	Grating	90	148.7	97.7	-170	20.2	-171.3	26.2095	36.4444	195.109	85.0434	135.782
130	Grating	90	115.3	-135.5	-191	-188.3	-296.7	10.8505	152.997	179.85	195.237	187.614
131	Grating	90	0.2	14.3	17.9	59	-18.3	68.1986	4.39871	37.9188	65.2561	138.659
132	Grating	90	-68.2	-25.8	-192.8	-145.8	-197.9	184.701	211.483	157.33	138.223	199.414
133	Grating	90	-148.6	-91.7	-232.4	-194.9	-143.8	246.066	222.32	209.891	240.447	246.241
134	Grating	90	17.4	22.7	56	151	53.2	3.3274	20.0844	28.1786	24.1172	14.5419
135	Grating	90	0.8	-0.7	-3.9	-8.6	-53.5	26.5651	100.437	95.2677	103.618	98.6205
136	Grating	90	-1.1	-5.5	-12.8	71.2	70	195.255	113.749	99.5601	52.0512	13.6692
137	Grating	90	-224.5	-137.5	-163.7	-292.8	29.4	169.776	124.185	153.955	167.627	76.0652
138	Grating	90	1.8	11.7	4.9	-147.6	-31.2	80.3625	80.6874	86.8381	178.256	99.355
139	Grating	90	-224.9	-286.3	169.2	403.5	-132.2	127.127	135.322	58.7459	35.8657	105.107
140	Grating	90	19.3	-27	0.1	NA	NA	64.0735	156.215	45	NA	NA
141	Grating	90	3.3	149.1	67.1	10.7	255.2	37.1467	6.3908	2.3895	15.1645	12.0549
142	Grating	90	144.2	85.1	106.1	128.9	280.3	24.2886	27.4489	13.7057	37.0403	11.2667
143	Grating	90	13	205.4	118.9	189.5	303.6	69.5806	16.8018	63.1235	43.2145	20.293
144	Grating	90	-39.1	NA	NA	NA	NA	207.033	NA	NA	NA	NA
145	Grating	90	51.2	-2.6	-36.1	8.5	-38	74.6695	93.1348	144.689	86.5875	112.321
146	Grating	90	-88.2	-24.2	-34.1	-20	-134.3	111.331	105.114	173.31	189.09	162.556
147	Grating	90	-36	-26	-8.7	-5	-1	118.148	148.392	130.462	131.76	259.315

## Sheet: Weevil parameters
Colour	Sex	Age (hours)	Starvation period (hours)	Angle
Sand	m	192	24	90
Sand	m	192	24	270
Sand	f	192	24	90
Sand	f	48	24	90
Sand	m	72	1	270
Sand	m	72	1	90
Sand	m	72	2	270
Sand	f	72	2	270
Sand	f	96	1	90
Sand	m	96	1	270
Sand	m	96	1	270
Sand	m	96	1	270
Sand	f	336	24	90
Sand	f	144	24	90
Sand	m	144	24	270
Yellow textured	m	336	24	90
Yellow textured	m	120	24	90
Yellow textured	m	120	24	270
Yellow textured	f	24	1	270
Yellow textured	m	24	1	270
Yellow textured	m	48	24	90
Yellow textured	m	48	24	90
Yellow textured	f	168	24	270
Yellow textured	f	168	24	270
Yellow textured	m	384	2	270
Yellow textured	f	384	2	90
Yellow textured	m	888	1	90
Yellow textured	f	672	1	270
Yellow textured	m	672	1	270
Yellow textured	m	528	2	270
Yellow textured	f	72	2	90
Amber	m	528	2	270
Amber	m	528	2	90
Amber	f	528	2	90
Amber	f	240	3	90
Amber	m	240	3	270
Amber	f	480	2	270
Amber	m	264	2	90
Amber	f	12	2	270
Amber	m	72	3	90
Amber	f	72	3	90
Amber	f	72	3	270
Amber	m	72	3	90
Amber	m	168	1	270
Amber	f	48	3	270
Amber	m	48	3	90
Orange	f	48	3	270
Orange	f	48	3	270
Orange	m	264	27	270
Orange	m	264	27	90
Orange	f	720	5	90
Orange	m	96	5	270
Orange	f	48	1	90
Orange	m	48	1	90
Orange	m	48	2	270
Orange	m	216	2	270
Orange	f	216	2	270
Orange	f	1200	4	90
Orange	f	24	4	90
Orange	f	24	4	270
Orange	f	240	4	270
Black	f	336	0	90
Black	f	336	0	90
Black	f	600	0	90
Black	f	600	0	90
Black	f	72	0	90
Black	f	72	3	90
Black	m	24	0	90
Black	m	24	0	90
Black	m	24	1	90
Black	m	48	1	90
Black	m	72	1	90
Black	f	72	1	90
Black	m	96	24	90
Black	m	96	24	90
Black	m	96	24	90
Black	m	96	24	90
Black	m	120	24	90
Black	f	24	0	90
Yellow	m	24	24	90
Yellow	m	24	24	90
Yellow	f	336	0	90
Yellow	m	336	0	90
Yellow	m	336	0	90
Yellow	f	504	4	90
Yellow	m	504	4	90
Yellow	f	120	4	90
Yellow	m	168	48	90
Yellow	m	168	48	90
Yellow	m	168	48	90
Yellow	f	48	0	90
Yellow	f	48	0	90
Yellow	f	72	24	90
Yellow	f	72	24	90
Yellow	m	72	24	90
Yellow	f	24	0	90
Yellow	f	24	0	90
Yellow	f	24	1	90
Yellow	m	24	1	90
Yellow	m	624	1	90
Yellow	f	720	72	90
Yellow	f	720	72	90
Yellow	m	168	72	90
Yellow	f	72	0	90
Yellow	m	120	24	90
Yellow	m	120	24	90
Yellow	f	120	24	90
Yellow	f	168	24	90
Yellow	m	168	24	90
Yellow	f	168	24	90
Control	f	192	24	90
Control	f	192	24	90
Control	m	192	24	90
Control	f	192	24	90
Control	f	960	0	90
Control	f	960	0	90
Control	f	72	48	90
Control	m	528	48	90
Control	m	48	3	90
Control	m	48	3	90
Control	f	240	0	90
Control	m	48	0	90
Control	f	24	0	90
Control	f	24	4	90
Control	f	24	4	90
Control	f	24	4	90
Control	m	264	4	90
